# Supplementary material
Source: Elsevier journal article supplement (https://www.sciencedirect.com/science/article/pii/S2173572722003290)
Supplement: mmc5 [file S2173572722003290:mmc5.docx]

Supplementary Table 2- Summary of the quantitative data of the included studies

| Reference | Incidence of VAP | | | | Mortality | | | | ICU lenght of stay | | | | Mechanical ventilation duration | | | |
| --- | --- | --- | --- | --- | --- | --- | --- | --- | --- | --- | --- | --- | --- | --- | --- | --- |
| CHX | Total | Control | Total | CHX | Total | Control | Total | CHX | SD | Control | SD | CHX | SD | Control | SD |
| Bellissimo-Rodrigues et al., (2009) (1) | 16 | 64 | 17 | 69 | 35 | 64 | 33 | 69 | - | - | - | - | - | - | - | - |
| Berry et al., (2011) (2) | 4 | 71 | 1 | 78 | - | - | - | - | - | - | - | - | - | - | - | - |
| Kes et al (2021) (3) | 10 | 27 | 17 | 27 |  |  |  |  |  |  |  |  |  |  |  |  |
| Koeman et al., (2006) (4) | 13 | 127 | 23 | 130 | - | - | - | - | 13.8 | 17.4 | 12.5 | 12.9 | 9.2 | 12 | 7 | 8.1 |
| Meidani et al., (2018) (5) | 32 | 91 | 28 | 88 | 64 | 88 | 51 | 83 | - | - | - | - | - | - | - | - |
| Meinberg et al., (2012) (6) | 6 | 50 | 15 | 50 | 4 | 50 | 5 | 105 | 22.4 | 13.4 | 21.1 | 14 | 16.6 | 9.6 | 16.5 | 11.7 |
| Özçaka et al., (2012) (7) | 38 | 92 | 55 | 100 | 25 | 44 | 19 | 100 | - | - | - | - | - | - | - | - |
| Panchabhai et al., (2009) (8) | 12 | 29 | 22 | 32 | 17 | 29 | 19 | 32 | 12.2 | 11.3 | 15.4 | 13.5 | 9 | 8.3 | 12.3 | 11.9 |
| Scannapieco et al., (2009) (9) | 14 | 97 | 12 | 49 | 8 | 97 | 8 | 49 | 11.3 | 6.7 | 11.5 | 6.8 | 8.9 | 5.1 | 9.7 | 6.3 |
| Tantipong et al., (2008) (10) | 5 | 58 | 10 | 52 | - | - | - | - | - | - | - | - | - | - | - | - |

1. Bellissimo-Rodrigues F, Bellissimo-Rodrigues WT, Viana JM, Teixeira GC, Nicolini E, Auxiliadora-Martins M, et al. Effectiveness of oral rinse with chlorhexidine in preventing nosocomial respiratory tract infections among intensive care unit patients. Infection control and hospital epidemiology. 2009;30(10):952-8.

2. Berry AM, Davidson PM, Masters J, Rolls K, Ollerton R. Effects of three approaches to standardized oral hygiene to reduce bacterial colonization and ventilator associated pneumonia in mechanically ventilated patients: a randomised control trial. International journal of nursing studies. 2011;48(6):681-8.

3. Kes D, Aydin Yildirim T, Kuru C, Pazarlıoglu F, Ciftci T, Ozdemir M. Effect of 0.12% Chlorhexidine Use for Oral Care on Ventilator-Associated Respiratory Infections: A Randomized Controlled Trial. Journal of trauma nursing : the official journal of the Society of Trauma Nurses. 2021;28(4):228-34.

4. Koeman M, van der Ven AJ, Hak E, Joore HC, Kaasjager K, de Smet AG, et al. Oral decontamination with chlorhexidine reduces the incidence of ventilator-associated pneumonia. American journal of respiratory and critical care medicine. 2006;173(12):1348-55.

5. Meidani M, Khorvash F, Abbasi S, Cheshmavar M, Tavakoli H. Oropharyngeal Irrigation to Prevent Ventilator-Associated-Pneumonia: Comparing Potassium Permangenate with Chlorhexidine. Int J Prev Med. 2018;9:93-.

6. Meinberg MC, Cheade Mde F, Miranda AL, Fachini MM, Lobo SM. The use of 2% chlorhexidine gel and toothbrushing for oral hygiene of patients receiving mechanical ventilation: effects on ventilator-associated pneumonia. Revista Brasileira de terapia intensiva. 2012;24(4):369-74.

7. Özçaka Ö, Başoğlu OK, Buduneli N, Taşbakan MS, Bacakoğlu F, Kinane DF. Chlorhexidine decreases the risk of ventilator-associated pneumonia in intensive care unit patients: a randomized clinical trial. Journal of periodontal research. 2012;47(5):584-92.

8. Panchabhai TS, Dangayach NS, Krishnan A, Kothari VM, Karnad DR. Oropharyngeal cleansing with 0.2% chlorhexidine for prevention of nosocomial pneumonia in critically ill patients: an open-label randomized trial with 0.01% potassium permanganate as control. Chest. 2009;135(5):1150-6.

9. Scannapieco F, Yu J, Raghavendran K, Vacanti A, Owens S, Wood K, et al. A randomized trial of chlorhexidine gluconate on oral bacterial pathogens in mechanically ventilated patients. Critical care (London, England). 2009;13:R117.

10. Tantipong H, Morkchareonpong C, Jaiyindee S, Thamlikitkul V. Randomized controlled trial and meta-analysis of oral decontamination with 2% chlorhexidine solution for the prevention of ventilator-associated pneumonia. Infection control and hospital epidemiology. 2008;29(2):131-6.
